# Supplementary material
Source: publisher figshare collection journal article supplement (https://sage.figshare.com/ndownloader/files/36009494)
Supplement: Supplementary file 1 [file 36009494]

| **Sex: Male** | | **Total Instances Observed** | | | **Incidence Range** | | |
| --- | --- | --- | --- | --- | --- | --- | --- |
| **Tissue** | **Observation** | **Cambodian** | **Chinese** | **Vietnamese** | **Cambodian** | **Chinese** | **Vietnamese** |
| Adrenal Glands | Alteration, Focal Cellular | - | - | 1 (1.01%), N=99 | - | - | [0-20.00%] |
| Angiectasis/Cystic Degeneration | - | 1 (0.16%), N=622 | - | - | [0-20.00%] | - |
| Anomaly (Developmental) | 1 (0.43%), N=231 | 1 (0.16%), N=622 | - | [0-20.00%] | [0-16.67%] | - |
| Fatty Change | - | - | 1 (1.01%), N=99 | - | - | [0-20.00%] |
| Hemorrhage | - | 1 (0.16%), N=622 | - | - | [0-33.33%] | - |
| Hypertrophy | 2 (0.87%), N=231 | 7 (1.13%), N=622 | 2 (2.02%), N=99 | [0-33.33%] | [0-50.00%] | [0-16.67%] |
| Infiltrate, (Mononuclear Cell) | 4 (1.73%), N=231 | 5 (0.8%), N=622 | 2 (2.02%), N=99 | [0-33.33%] | [0-25.00%] | [0-22.22%] |
| Inflammation | 1 (0.43%), N=231 | - | - | [0-16.67%] | - | - |
| Macrophages | - | 2 (0.32%), N=622 | - | - | [0-20.00%] | - |
| Mineralization | 9 (3.9%), N=231 | 41 (6.59%), N=622 | 7 (7.07%), N=99 | [0-33.33%] | [0-50.00%] | [0-50.00%] |
| Pigment | 1 (0.43%), N=231 | 1 (0.16%), N=622 | 2 (2.02%), N=99 | [0-20.00%] | [0-16.67%] | [0-22.22%] |
| Vacuolation | - | 2 (0.32%), N=622 | - | - | [0-20.00%] | - |
| Epididymides | Anomaly (Developmental) | 1 (0.47%), N=212 | 2 (0.34%), N=584 | 1 (1.09%), N=92 | [0-16.67%] | [0-25.00%] | [0-20.00%] |
| Cell Debris | - | 1 (0.17%), N=584 | - | - | [0-14.29%] | - |
| Fibrosis | 1 (0.47%), N=212 | - | 1 (1.09%), N=92 | [0-12.50%] | - | [0-16.67%] |
| Hemorrhage | - | 1 (0.17%), N=584 | - | - | [0-11.11%] | - |
| Infiltrate, (Mononuclear Cell) | 5 (2.36%), N=212 | 12 (2.05%), N=584 | 2 (2.17%), N=92 | [0-33.33%] | [0-100.00%] | [0-66.67%] |
| Inflammation (Eosinophils) | 1 (0.47%), N=212 | - | - | [0-11.11%] | - | - |
| Inflammation | - | 2 (0.34%), N=584 | - | - | [0-66.67%] | - |
| Polyp, Benign | 1 (0.47%), N=212 | - | - | [0-20.00%] | - | - |
| Sperm, Decreased/Cell Debris | - | 6 (1.03%), N=584 | - | - | [0-60.00%] | - |
| Mammary Gland | Dilatation | 1 (1.41%), N=71 | - | - | [0-16.67%] | - | - |
| Infiltrate, (Mononuclear Cell) | 1 (1.41%), N=71 | 1 (0.74%), N=136 | - | [0-33.33%] | [0-25.00%] | - |
| Parathyroid Glands | Anomaly (Developmental) | 1 (0.54%), N=185 | - | - | [0-25.00%] | - | - |
| Cyst | 3 (1.62%), N=185 | 6 (1.35%), N=446 | - | [0-25.00%] | [0-33.33%] | - |
| Infiltrate, (Mononuclear Cell) | 1 (0.54%), N=185 | 8 (1.79%), N=446 | 2 (2.63%), N=76 | [0-12.50%] | [0-33.33%] | [0-16.67%] |
| Inflammation | 1 (0.54%), N=185 | - | - | [0-20.00%] | - | - |
| Prostate Gland | Infiltrate, (Mononuclear Cell) | 32a*, b* (15.02%), N=213 | 52a* (9%), N=578 | 10b* (10.42%), N=96 | [0-80.00%] | [0-66.67%] | [0-55.56%] |
| Inflammation | 2 (0.94%), N=213 | 7 (1.21%), N=578 | - | [0-20.00%] | [0-33.33%] | - |
| Seminal Vesicles | Hemorrhage | - | 1 (0.17%), N=579 | - | - | [0-16.67%] | - |
| Infiltrate, (Mononuclear Cell) | 2 (0.94%), N=212 | 2 (0.35%), N=579 | 1 (1.08%), N=93 | [0-16.67%] | [0-25.00%] | [0-11.11%] |
| Mineralization | 1 (0.47%), N=212 | 1 (0.17%), N=579 | - | [0-14.29%] | [0-16.67%] | - |
| Testes | Fibrosis | 2 (6.45%), N=31 | 2 (0.57%), N=353 | - | [0-40.00%] | [0-40.00%] | - |
| Granuloma | - | 1 (0.28%), N=353 | - | - | [0-16.67%] | - |
| Hypoplasia | 7 (22.58%), N=31 | 37 (10.48%), N=353 | 4 (4.88%), N=82 | [0-50.00%] | [0-100.00%] | [0-33.33%] |
| Hypospermatogenesis, Bilateral | - | 3 (0.85%), N=353 | - | - | [0-42.86%] | - |
| Infiltrate, (Mononuclear Cell) | - | 2 (0.57%), N=353 | - | - | [0-25.00%] | - |
| Peripubertal | - | 4 (1.13%), N=353 | - | - | [0-100.00%] | - |
| Vacuolation (Stromal Cell) | 1 (3.23%), N=31 | 10 (2.83%), N=353 | 1 (1.22%), N=82 | [0-20.00%] | [0-50.00%] | [0-11.11%] |
| Thyroid Gland | Anomaly (Developmental) | 15 (6.55%), N=229 | 21 (3.43%), N=612 | - | [0-100.00%] | [0-50.00%] | - |
| Colloid, Decreased | - | - | 1 (1.01%), N=99 | - | - | [0-20.00%] |
| Colloid, Increased | 2 (0.87%), N=229 | 1 (0.16%), N=612 | - | [0-33.33%] | [0-33.33%] | - |
| Cyst | 15 (6.55%), N=229 | 33 (5.39%), N=612 | 8 (8.08%), N=99 | [0-50.00%] | [0-66.67%] | [0-100.00%] |
| Histiocytosis | 2 (0.87%), N=229 | 14 (2.29%), N=612 | 1 (1.01%), N=99 | [0-22.22%] | [0-100.00%] | [0-11.11%] |
| Infiltrate, (Mononuclear Cell) | 11a*, b* (4.8%), N=229 | 38a* (6.21%), N=612 | 8b* (8.08%), N=99 | [0-50.00%] | [0-66.67%] | [0-66.67%] |
| Inflammation | 1 (0.44%), N=229 | - | - | [0-20.00%] | - | - |
| Mineralization | - | 2 (0.33%), N=612 | - | - | [0-25.00%] | - |
| Secretory Depletion | 1 (0.44%), N=229 | - | - | [0-12.50%] | - | - |

| **Sex: Female** | | **Total Instances Observed** | | | **Incidence Range** | | |
| --- | --- | --- | --- | --- | --- | --- | --- |
| **Tissue** | **Observation** | **Cambodian** | **Chinese** | **Vietnamese** | **Cambodian** | **Chinese** | **Vietnamese** |
| Adrenal Glands | Accessory Tissue | - | - | 2 (2.04%), N=98 | - | - | [0-40.00%] |
| Anomaly (Developmental) | 1 (0.45%), N=220 | 2 (0.32%), N=616 | - | [0-16.67%] | [0-16.67%] | - |
| Congestion | - | 1 (0.16%), N=616 | - | - | [0-16.67%] | - |
| Fatty Change | - | 2 (0.32%), N=616 | - | - | [0-33.33%] | - |
| Granuloma | 1 (0.45%), N=220 | - | - | [0-16.67%] | - | - |
| Hemorrhage | - | 2 (0.32%), N=616 | - | - | [0-33.33%] | - |
| Histiocytosis | - | 1 (0.16%), N=616 | - | - | [0-25.00%] | - |
| Hypertrophy | 2 (0.91%), N=220 | 9 (1.46%), N=616 | 1 (1.02%), N=98 | [0-20.00%] | [0-50.00%] | [0-11.11%] |
| Infiltrate (Mixed Leukocyte) | - | 1 (0.16%), N=616 | - | - | [0-16.67%] | - |
| Infiltrate, (Mononuclear Cell) | 1 (0.45%), N=220 | 4 (0.65%), N=616 | - | [0-25.00%] | [0-33.33%] | - |
| Mineralization | 9 (4.09%), N=220 | 33 (5.36%), N=616 | 5 (5.1%), N=98 | [0-25.00%] | [0-33.33%] | [0-25.00%] |
| Pigment | - | 1 (0.16%), N=616 | - | - | [0-10.00%] | - |
| Thrombus | - | 1 (0.16%), N=616 | - | - | [0-25.00%] | - |
| Vacuolation | 1 (0.45%), N=220 | 2 (0.32%), N=616 | - | [0-16.67%] | [0-20.00%] | - |
| Mammary Gland | Degeneration/Necrosis | - | 2 (0.34%), N=588 | - | - | [0-50.00%] | - |
| Dilatation | 4a*, b* (1.84%), N=217 | 1a* (0.17%), N=588 | -b* | [0-50.00%] | [0-25.00%] | - |
| Histiocytosis | 1 (0.46%), N=217 | - | - | [0-16.67%] | - | - |
| Infiltrate, (Mononuclear Cell) | - | 5 (0.85%), N=588 | - | - | [0-25.00%] | - |
| Inflammation | 1 (0.46%), N=217 | 1 (0.17%), N=588 | - | [0-16.67%] | [0-10.00%] | - |
| Vacuolation | 1 (0.46%), N=217 | - | - | [0-16.67%] | - | - |
| Ovaries | Atrophy | - | 1 (0.24%), N=412 | - | - | [0-20.00%] | - |
| Corpora Lutea, Decreased Number | - | 3 (0.73%), N=412 | - | - | [0-33.33%] | - |
| Cyst | 19 (33.93%), N=56 | 50 (12.14%), N=412 | 5 (5.21%), N=96 | [0-50.00%] | [0-100.00%] | [0-25.00%] |
| Mineralization | 22 (39.29%), N=56 | 128 (31.07%), N=412 | 36 (37.5%), N=96 | [0-75.00%] | [0-100.00%] | [0-100.00%] |
| Oviducts | Cyst | 2 (1.3%), N=154 | 2 (0.4%), N=503 | - | [0-20.00%] | [0-16.67%] | - |
| Infiltrate, (Mononuclear Cell) | - | 1 (0.2%), N=503 | - | - | [0-11.11%] | - |
| Parathyroid Glands | Cyst | 4 (2.22%), N=180 | 4 (0.88%), N=454 | 1 (1.2%), N=83 | [0-33.33%] | [0-40.00%] | [0-20.00%] |
| Infiltrate, (Eosinophils) | - | 1 (0.22%), N=454 | - | - | [0-16.67%] | - |
| Infiltrate, (Mononuclear Cell) | - | 3 (0.66%), N=454 | 2 (2.41%), N=83 | - | [0-33.33%] | [0-20.00%] |
| Thyroid Gland | Anomaly (Developmental)a*, b* | 17 (7.91%), N=215 | 20 (3.32%), N=602 | - | [0-75.00%] | [0-50.00%] | - |
| Colloid, Increased | 1 (0.47%), N=215 | 2 (0.33%), N=602 | - | [0-16.67%] | [0-20.00%] | - |
| Cyst | 8 (3.72%), N=215 | 22 (3.65%), N=602 | 2 (2.04%), N=98 | [0-33.33%] | [0-50.00%] | [0-20.00%] |
| Hemorrhage | - | 2 (0.33%), N=602 | - | - | [0-16.67%] | - |
| Histiocytosis | 2 (0.93%), N=215 | 16 (2.66%), N=602 | 3 (3.06%), N=98 | [0-66.67%] | [0-50.00%] | [0-33.33%] |
| Hypoplasia | - | 1 (0.17%), N=602 | - | - | [0-20.00%] | - |
| Infiltrate, (Mononuclear Cell) | 3 (1.4%), N=215 | 25c* (4.15%), N=602 | 7c* (7.14%), N=98 | [0-20.00%] | [0-60.00%] | [0-33.33%] |
| Inflammation | 2 (0.93%), N=215 | 2 (0.33%), N=602 | - | [0-20.00%] | [0-16.67%] | - |
| Mineralization | 2 (0.93%), N=215 | 2 (0.33%), N=602 | - | [0-33.33%] | [0-20.00%] | - |
| Uterus with Cervix | Anomaly (Developmental) | - | 2 (0.33%), N=598 | - | - | [0-20.00%] | - |
| Congestion | - | 1 (0.17%), N=598 | - | - | [0-25.00%] | - |
| Cyst | 2 (0.93%), N=214 | 2 (0.33%), N=598 | 1 (1%), N=100 | [0-20.00%] | [0-20.00%] | [0-33.33%] |
| Degeneration/Necrosis (Epithelium) | - | 3 (0.5%), N=598 | - | - | [0-50.00%] | - |
| Dilatation | - | 5 (0.84%), N=598 | 1 (1%), N=100 | - | [0-100.00%] | [0-16.67%] |
| Exudate | - | 3 (0.5%), N=598 | - | - | [0-16.67%] | - |
| Hemorrhage | 1 (0.47%), N=214 | 2 (0.33%), N=598 | - | [0-16.67%] | [0-33.33%] | - |
| Infiltrate, (Mononuclear Cell) | 3 (1.4%), N=214 | 7 (1.17%), N=598 | 1 (1%), N=100 | [0-33.33%] | [0-66.67%] | [0-25.00%] |
| Inflammation | 6 (2.8%), N=214 | 35 (5.85%), N=598 | 4 (4%), N=100 | [0-75.00%] | [0-100.00%] | [0-44.44%] |
| Macrophages | 1 (0.47%), N=214 | 3 (0.5%), N=598 | - | [0-16.67%] | [0-40.00%] | - |
| Metaplasia | - | 5 (0.84%), N=598 | - | - | [0-33.33%] | - |
| Vagina | Exudate | - | 1 (0.17%), N=595 | - | - | [0-16.67%] | - |
| Infiltrate, (Mononuclear Cell) | 6 (2.8%), N=214 | 18 (3.03%), N=595 | 1 (1.02%), N=98 | [0-66.67%] | [0-100.00%] | [0-20.00%] |
| Inflammation | 2 (0.93%), N=214 | 2 (0.34%), N=595 | 2 (2.04%), N=98 | [0-33.33%] | [0-33.33%] | [0-22.22%] |
